# Supplementary material
Source: publisher figshare collection journal article supplement (https://acs.figshare.com/ndownloader/files/4211479)
Supplement: Supplementary file 1 [file 4211479]

Supporting Information

for

Ion Conduction in Polyethylene Oxide  
Ionically-Assembled Complexes

*Lu Zhang<sup>1</sup>, Brian L. Chaloux<sup>2</sup>, Tomonori Saito<sup>2</sup>, Michael A. Hickner<sup>2</sup>, Jodie L.  
Lutkenhaus<sup>1\*</sup>*

<sup>1</sup>Artie McFerrin Department of Chemical Engineering, Texas A&M University,  
College Station, TX 77843

<sup>2</sup>Department of Materials Science and Engineering, The Pennsylvania State University,  
University Park, PA 16802

**Table S1.** Glass transition temperatures of various PEO-ionomers examined

| PEO Ionomer                             | T <sub>g</sub> (K) |
|-----------------------------------------|--------------------|
| 100% aminated polyurethane (Figure 1a)  | 250                |
| 50% aminated polyurethane (Figure 1a)   | 248                |
| 50% sulfonated polyacrylate (Figure 1b) | 236                |
| 66% sulfonated polyacrylate (Figure 1b) | 240                |

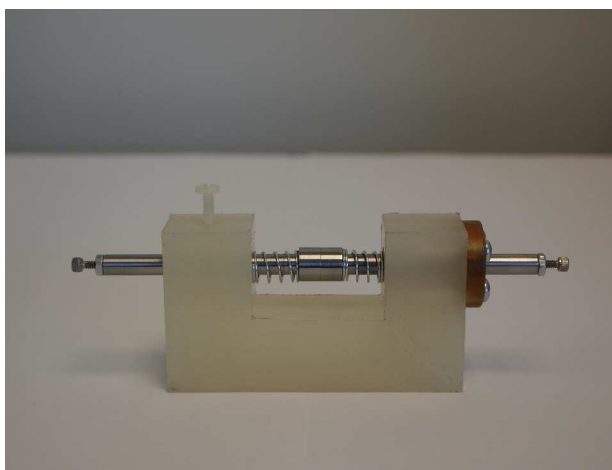

**Figure S1.** The device used for ionic conductivity measurement.

### Equivalent circuit modeling

ZView™ software was used to analyze all complex impedance measurement to obtain the through-plane resistance of the polyelectrolyte cell ( $R_p$ ) using equivalent circuit modeling, as illustrated in supplementary Figure S2. Because the polyelectrolyte complex does not have an ideal capacitance, a constant phase element (CPE) was used in place of a capacitor.  $R_s$  and  $R_p$  represent the resistance of connecting wires and the resistance of polyelectrolyte complex, respectively. The ionic conductivity of the polyelectrolyte complex ( $\sigma$  in S/cm) was then determined according to the following equation:

$$\sigma = \frac{l}{R_p A}$$

where  $l$  is the thickness of the cell membrane,  $R_p$  is the measured through-plane resistance of the polyelectrolyte complex membrane and  $A$  is the cross-sectional area of the cell membrane.

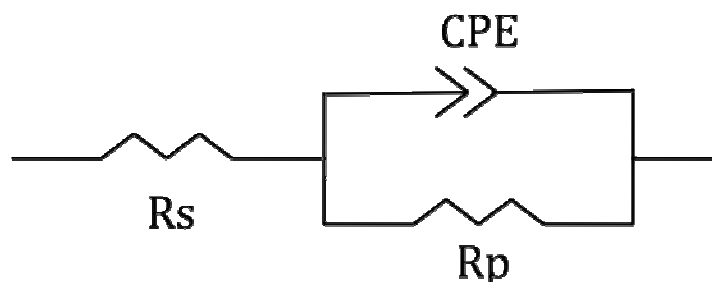

**Figure S2.** The equivalent circuit model used for the analysis of complex impedance measurement to get the through-plane resistance of the polyelectrolyte cell ( $R_p$ ).
